# Supplementary material
Source: Research Square preprint supplement (doi:10.21203/rs.3.rs-8888185/v1)
Supplement: Supplementary file 1 [file c1329ebf4849c23248979974.docx]

**Supplementary Material**

**Supplementary Figure S1. Overview of patient app versions and clinician dashboard.**

Representative screenshots illustrating study-specific patient-facing app interfaces for symptom tracking and related functions, and the clinician dashboard used for patient overview and longitudinal review.


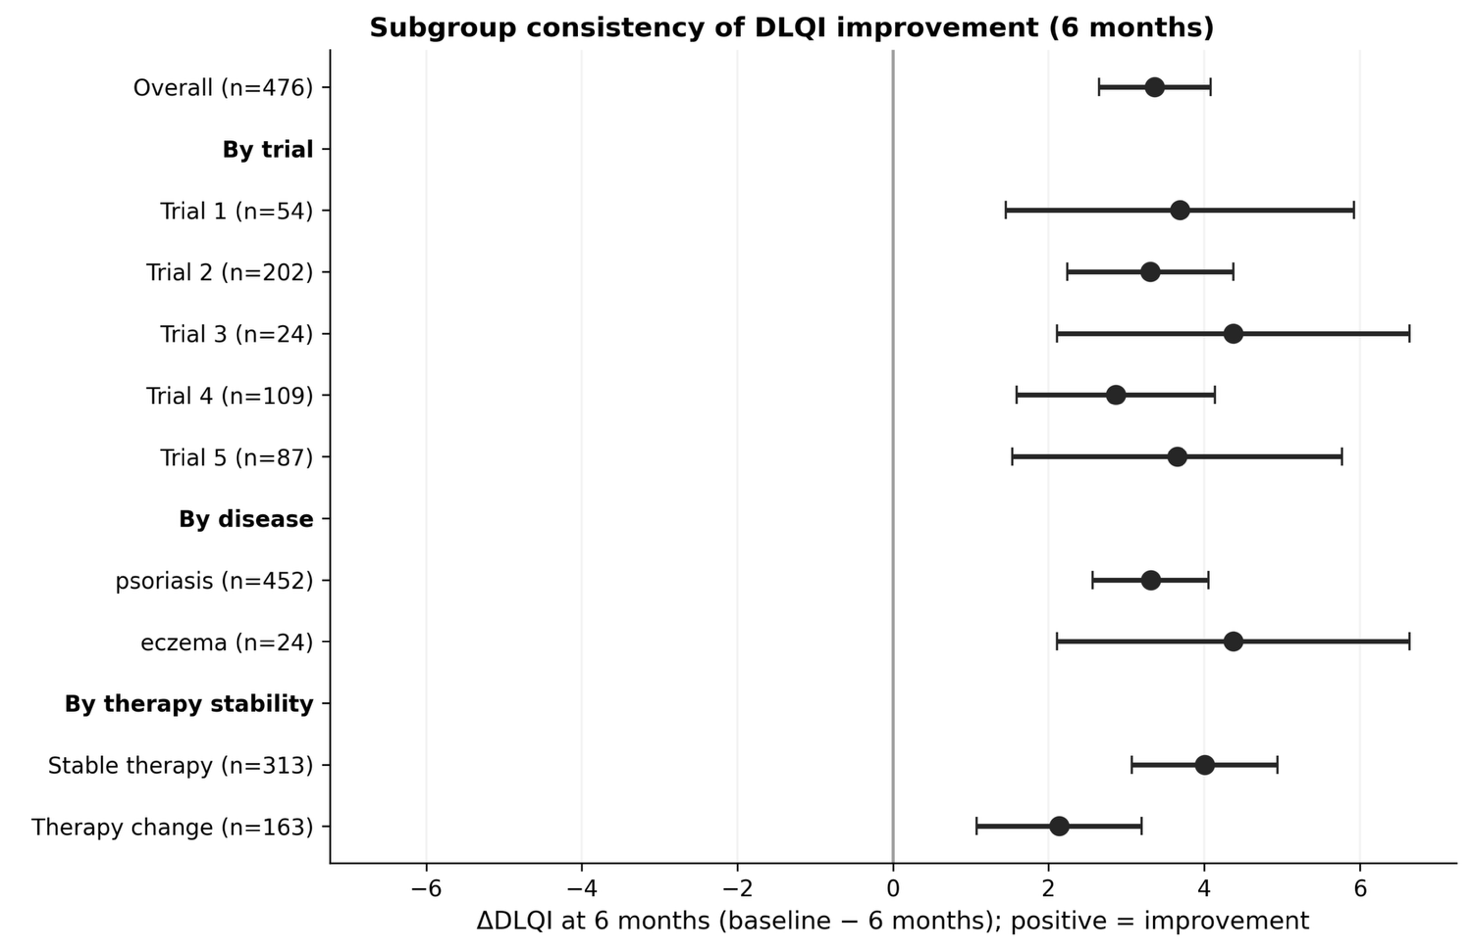


**Supplementary Figure S2: Subgroup consistency of DLQI improvement at 6 months.**

Forest plot showing mean ΔDLQI (baseline − 6 months; positive values indicate improvement) with 95% confidence intervals across subgroups: overall, by trial, by disease (psoriasis vs eczema), and by therapy stability (stable therapy vs therapy change). Sample sizes for each subgroup are shown in the labels.


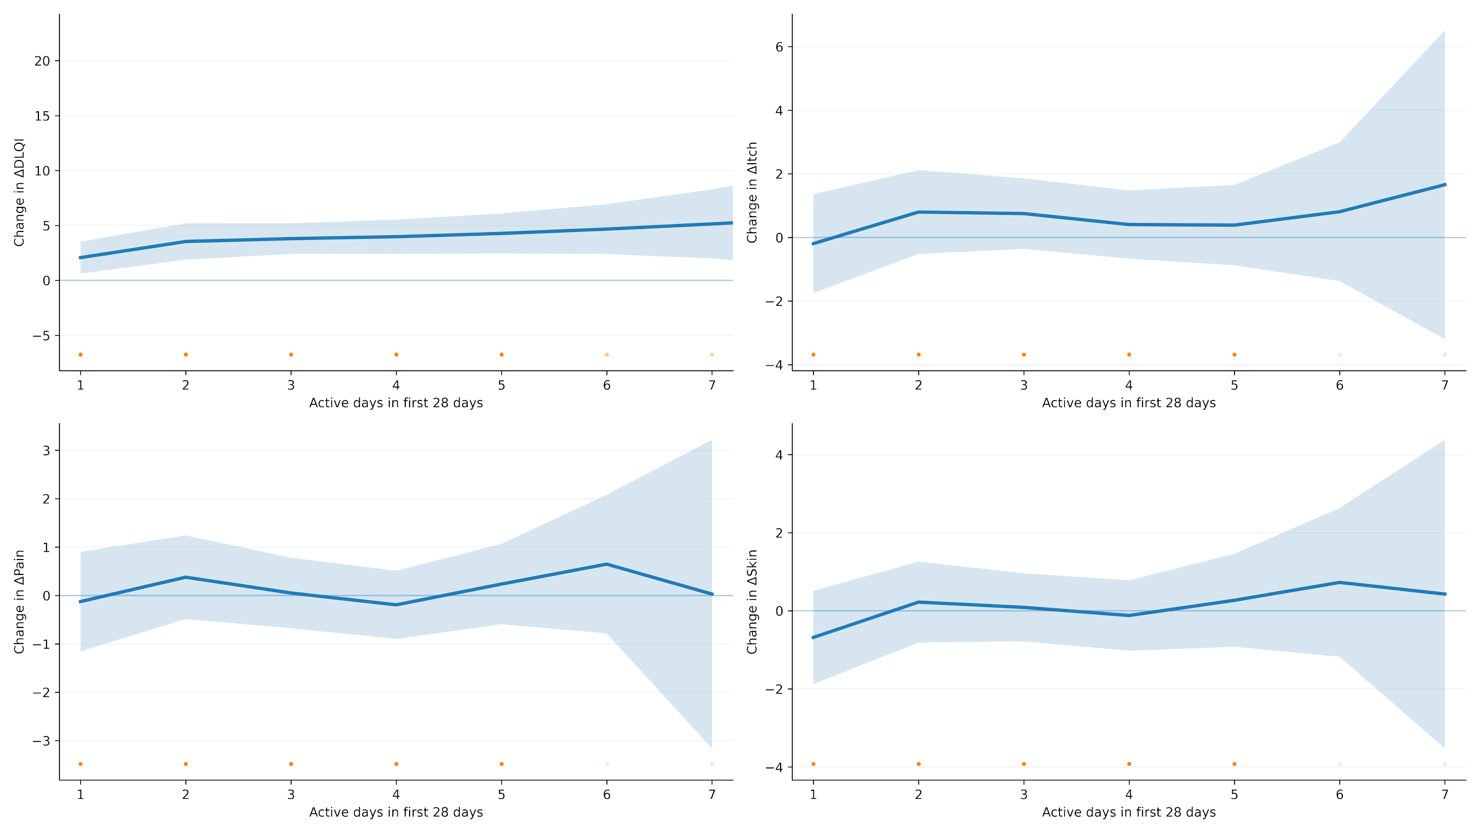


**Supplementary Figure S3:** **Early engagement and change outcomes.**

Model-based estimates of adjusted change plotted against early engagement intensity (active days with ≥1 app entry during the first 28 days after first use). The DLQI panel shows visit-based 6-month improvement (baseline − 6 months; positive values indicate improvement). Symptom panels (itch, pain, skin) show EMA-derived change proxies comparing mean symptom levels in weeks 0–3 versus weeks 23–26 after first use (positive values indicate improvement). Solid lines represent fitted values and shaded areas indicate 95% confidence intervals; uncertainty widens at higher engagement levels owing to fewer observations.
